# Supplementary material
Source: PubMed Central journal article supplement (PMC1838486)

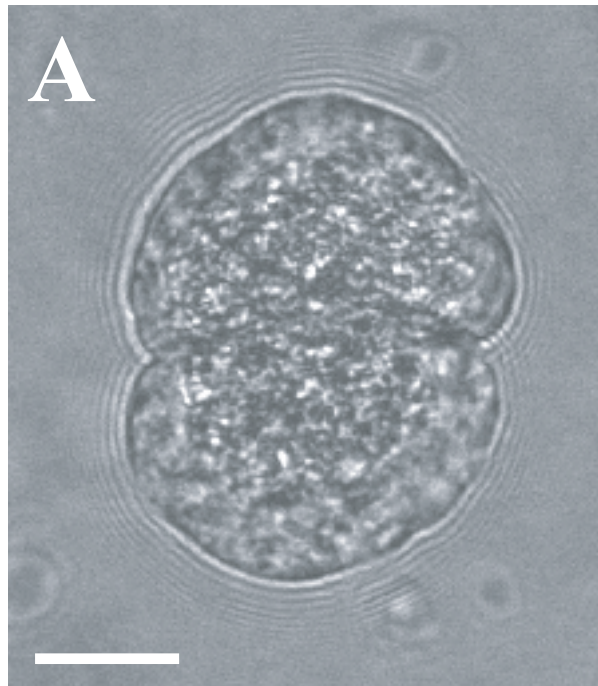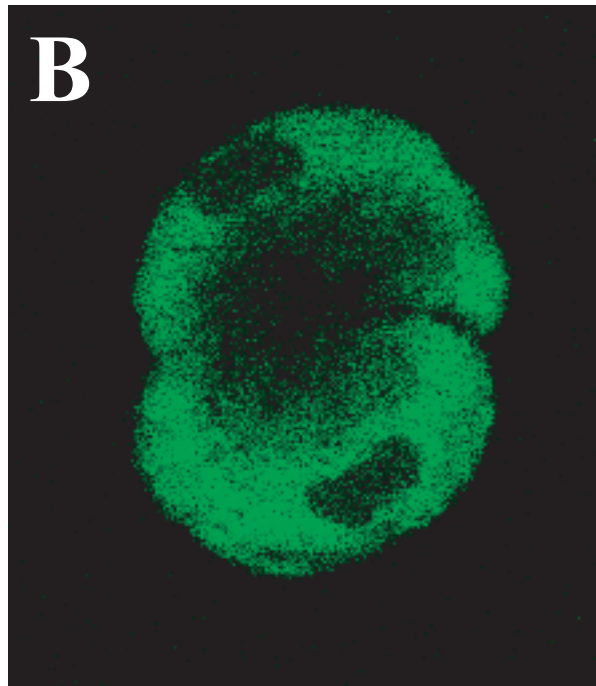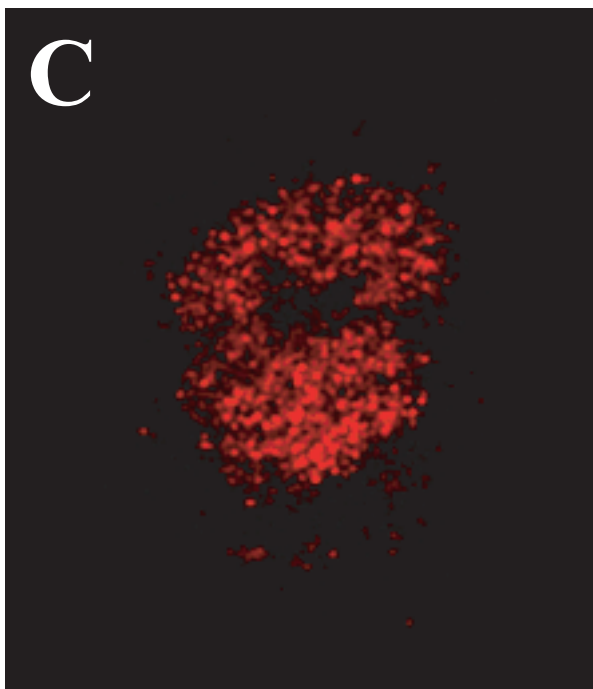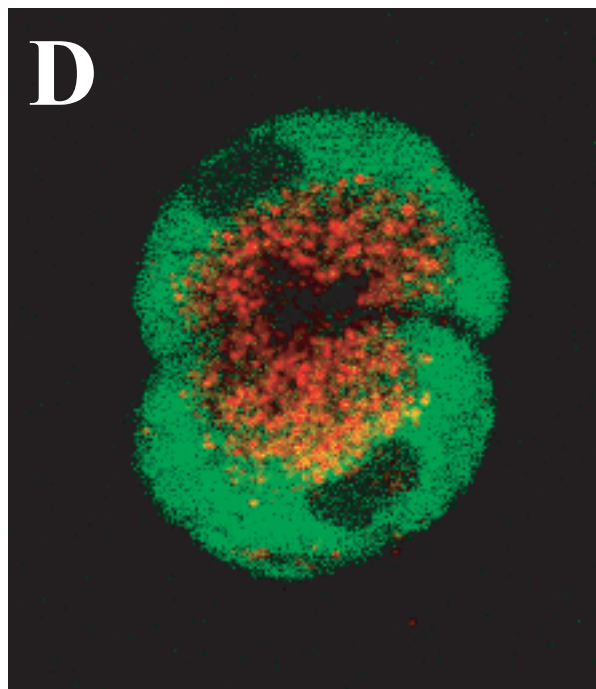

Supplement: pnas_0700951104_1.pdf [file pnas_0700951104_1.pdf]

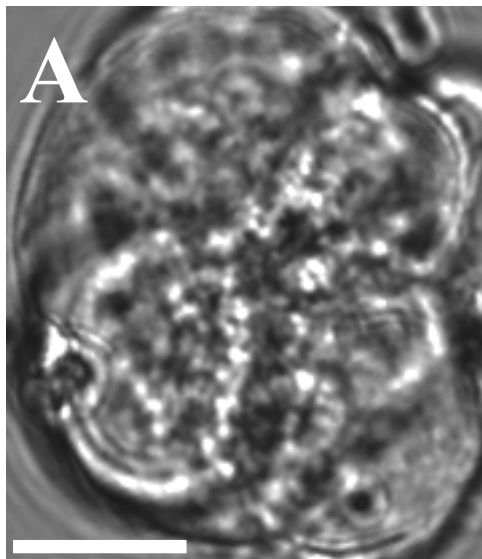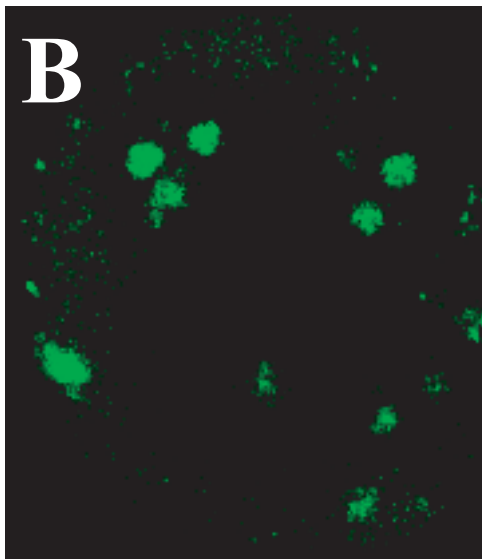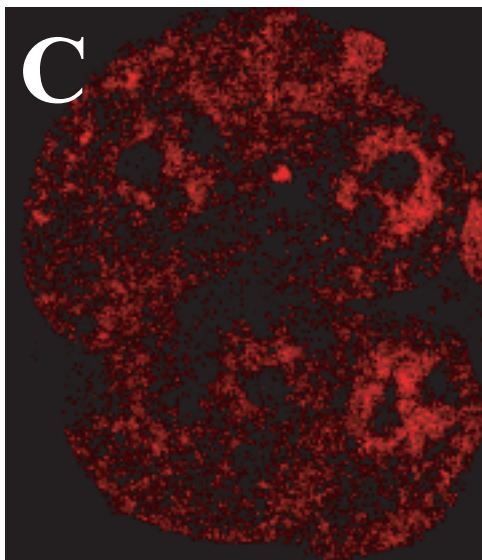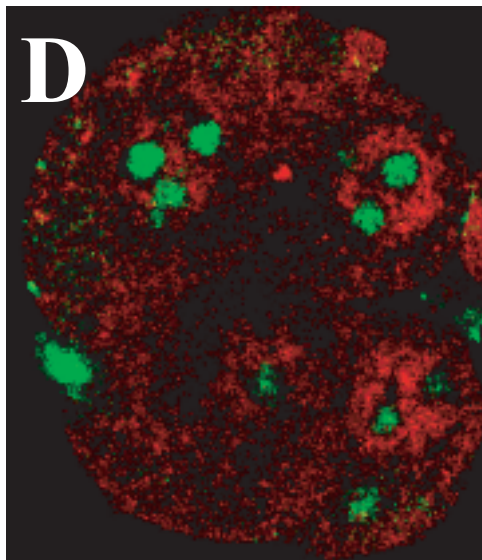

Supplement: pnas_0700951104_2.pdf [file pnas_0700951104_2.pdf]

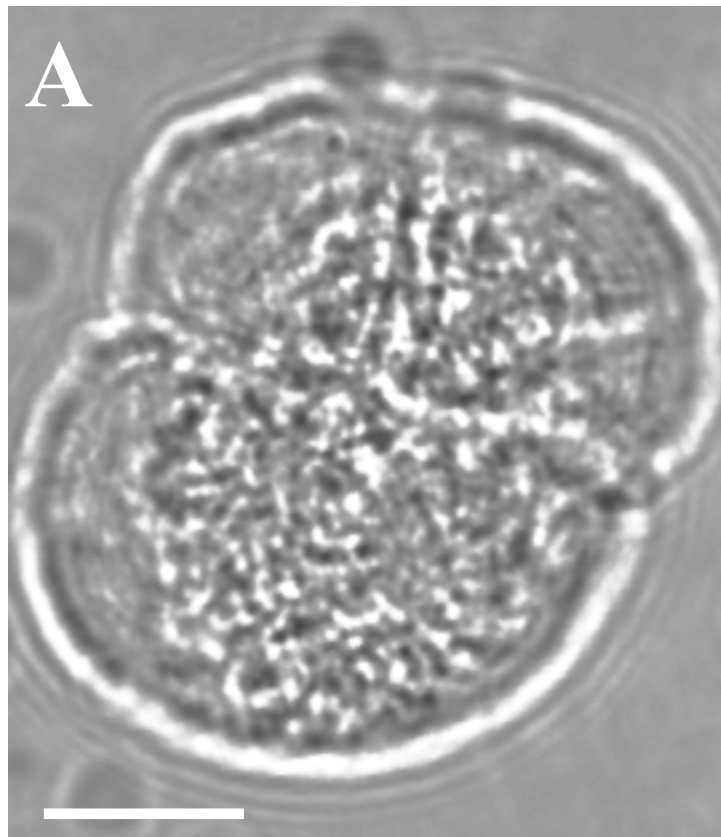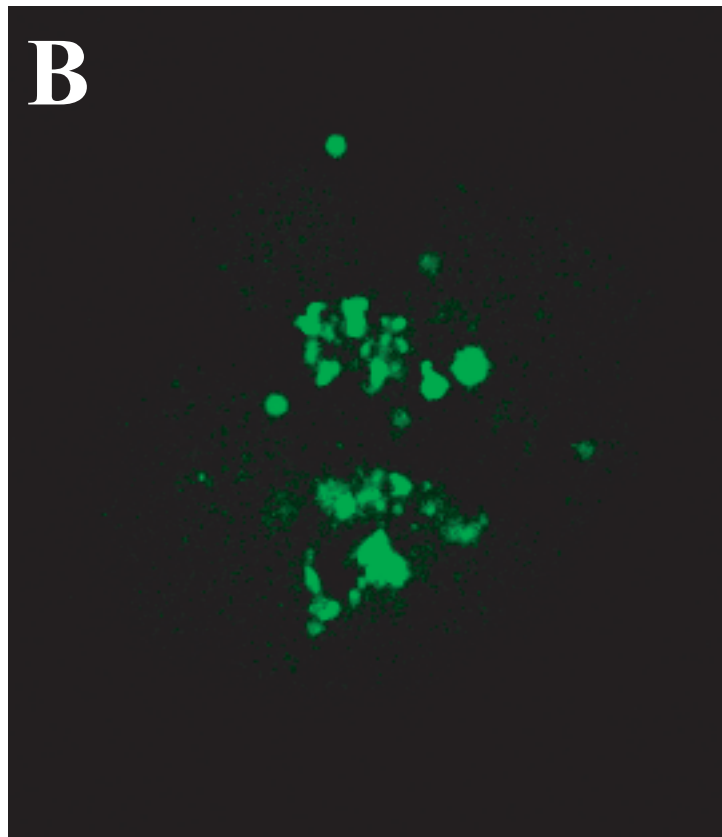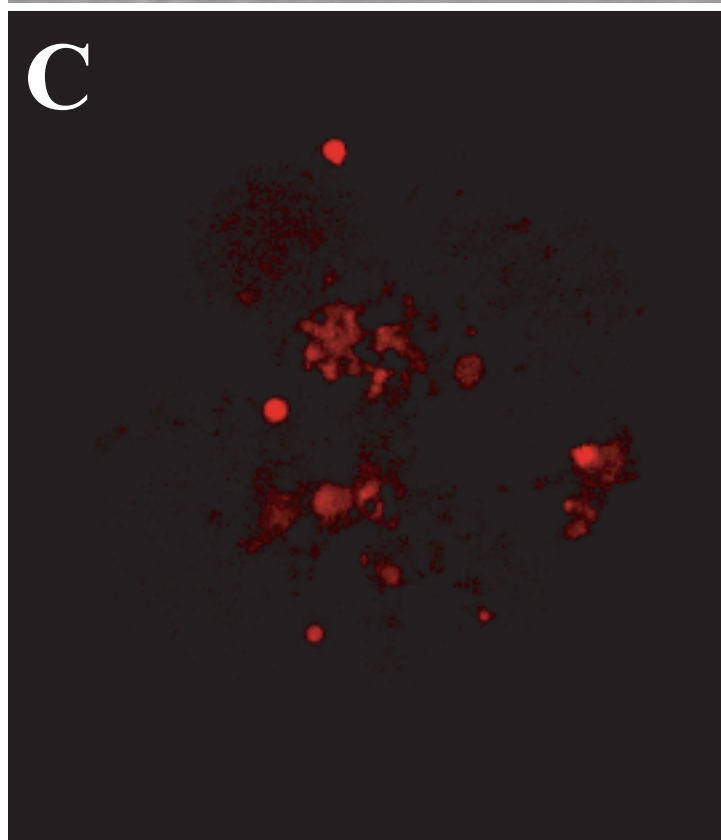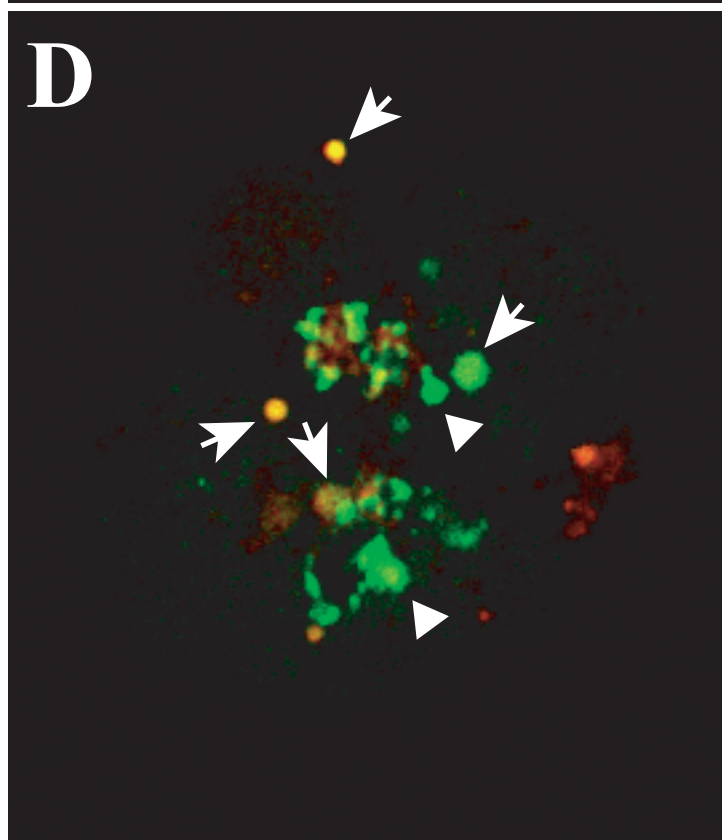

Supplement: pnas_0700951104_3.pdf [file pnas_0700951104_3.pdf]

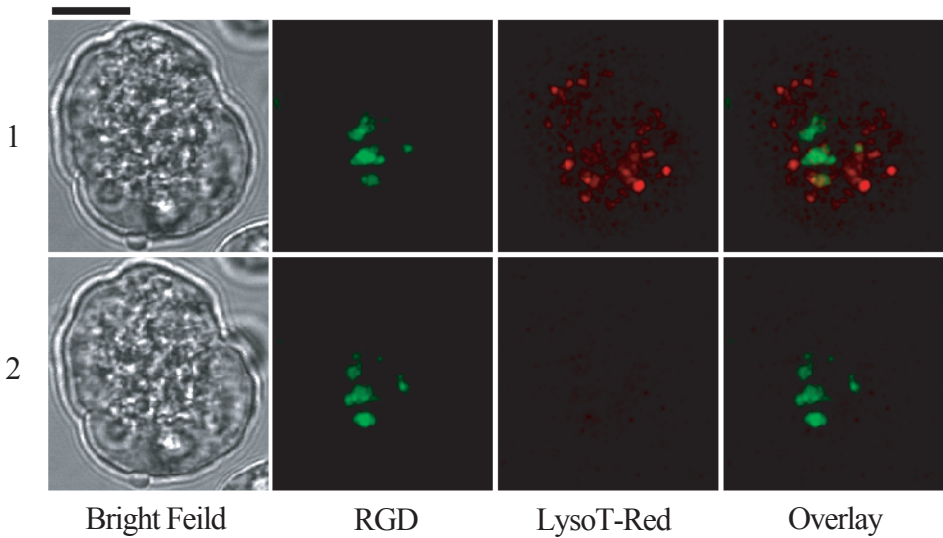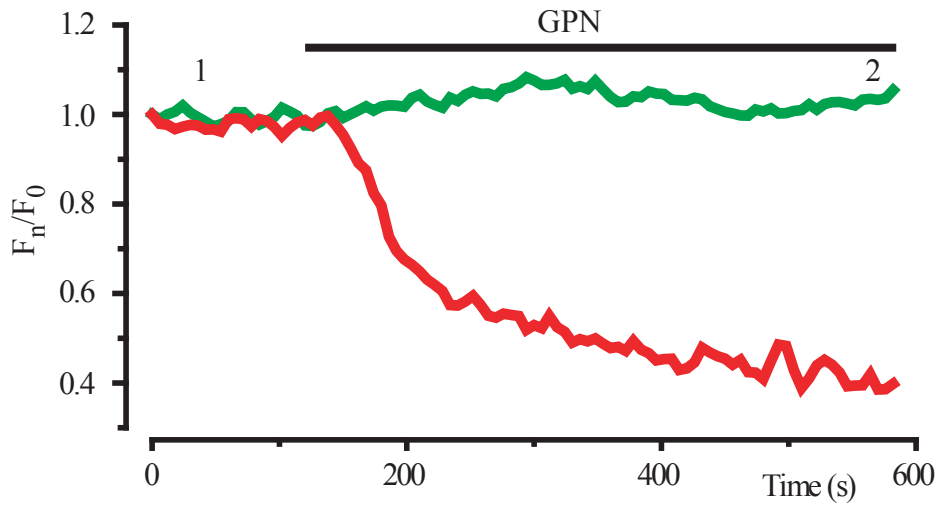

Supplement: pnas_0700951104_4.pdf [file pnas_0700951104_4.pdf]
